# Supplementary material for: Functional Identification of Serine Hydroxymethyltransferase as a Key Gene Involved in Lysostaphin Resistance and Virulence Potential of Staphylococcus aureus Strains
Source: Int J Mol Sci. 2020 Nov 30;21(23):9135. doi: 10.3390/ijms21239135 (PMC7731198; doi:10.3390/ijms21239135)
Supplement: Supplementary file 1 [file ijms-21-09135-s001.pdf]

# Supporting Information

## TITLE

**Functional identification of serine hydroxymethyltransferase as a key gene involved in lysostaphin resistance and virulence potential of *Staphylococcus aureus* strains**

## RUNNING TITLE

**Role of *shmT* in lysostaphin resistance and virulence**

## AUTHORS

Nayab Batool<sup>1</sup>, Kwan Soo Ko<sup>2</sup>, Akhilesh Kumar Chaurasia<sup>1\*</sup> and Kyeong Kyu Kim<sup>1,2\*</sup>

<sup>1</sup>Department of Precision Medicine, Institute for Antimicrobial Resistance Research and Therapeutics, Sungkyunkwan University School of Medicine, Suwon 16419, South Korea

<sup>2</sup>Samsung Advanced Institute for Health Sciences and Technology (SAIHST), Samsung Medical Center (SMC), Sungkyunkwan University School of Medicine, Seoul 06351, South Korea

## \*Corresponding authors

Akhilesh Kumar Chaurasia ([chaurasia@skku.edu](mailto:chaurasia@skku.edu))

Kyeong Kyu Kim ([kyeongkyu@skku.edu](mailto:kyeongkyu@skku.edu))

PHONE: +82-31-299-6152

FAX: +82-31-299-6159

## Content

### 1. Supplementary figures

**Fig S1.** Lysostaphin killing kinetics of human isolates of ST72

**Fig S2.** Scanning electron and confocal microscopy of ST72 resistant soil isolate, 4-009 to assess lysostaphin-mediated alteration in cell morphology and live/dead staining

**Fig S3.** PCR based screening of presence/absence of *epr* and *lss* genes responsible for lysostaphin resistance in human isolates of ST72

**Fig S4.** PCR amplification, cloning, sequencing, and screening of associated mutation(s) in other key genes known for lysostaphin resistance

**Fig S5.** Cloning, sequencing, multiple sequence alignment to assess the mutation(s) upon translated DNA sequences

**Fig. S6.** Alignment of SHMT from *S. aureus* USA300 with human *SHMTs* to assess the overall similarity and identity

**Fig. S7.** Role of SHMT in lysostaphin resistance of K07-204 human isolate of ST72

**Fig. S8.** The role of *shmT* on the fitness of *S. aureus* USA300

**Fig. S9.** Serine hydroxymethyltransferase inhibitor 1 (SHIN1) toxicity to *S. aureus* USA300 cells at varying concentrations

### 2. Tables

**Table S1.** wild type *S. aureus* ST72 isolates

**Table S2.** Primers used in the study

**Table S3.** Staphylococcal strains/isolates and plasmid used in the study

## Supporting Fig. S1

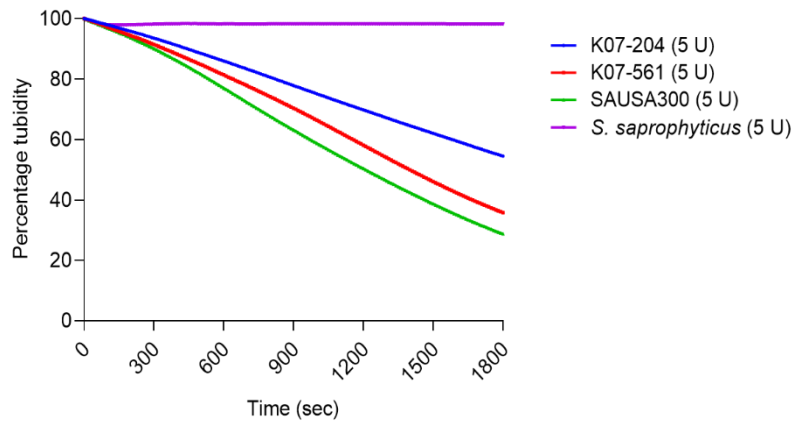

### Supporting Fig. S1. Lysostaphin killing kinetics of human isolates of ST72. (A)

Lysostaphin mediated killing efficiency using turbidity reduction among *lys*<sup>r</sup> (K07-204) and *lys*<sup>s</sup> (K07-561) in comparison to *S. aureus* USA300. Lysostaphin resistant *lys*<sup>r</sup> K07-204 showed 37% percent turbidity reduction as compared to  $\geq 60\%$  turbidity reduction for K07-561 and *S. aureus* USA300 within 30 min of lysostaphin treatment. *S. saprophyticus* displayed resistance to lysostaphin treatment.

Supporting Fig. S2

A

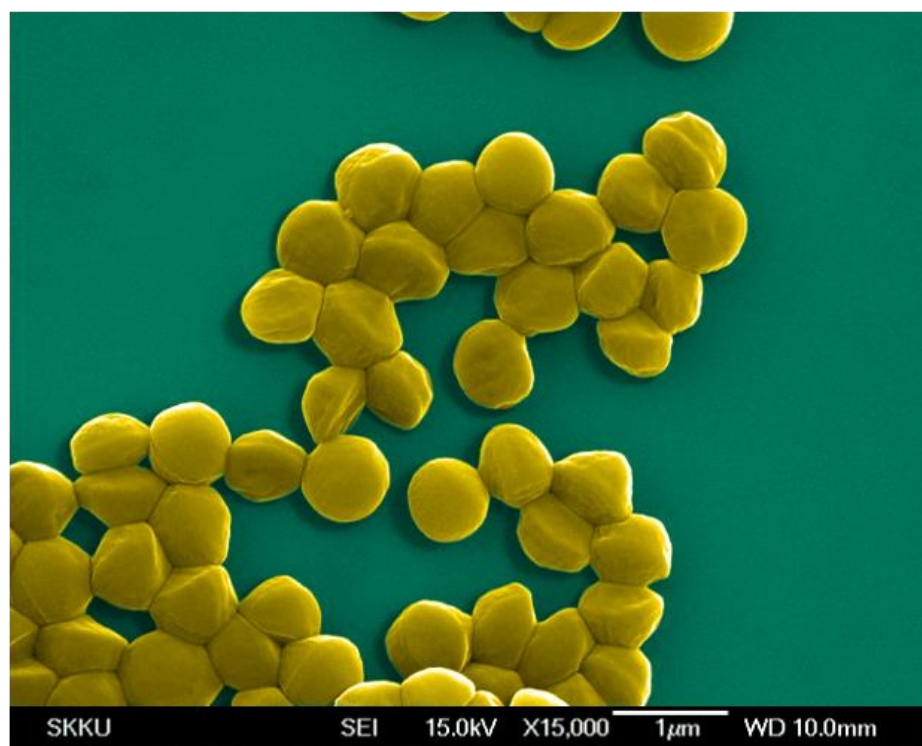

A'

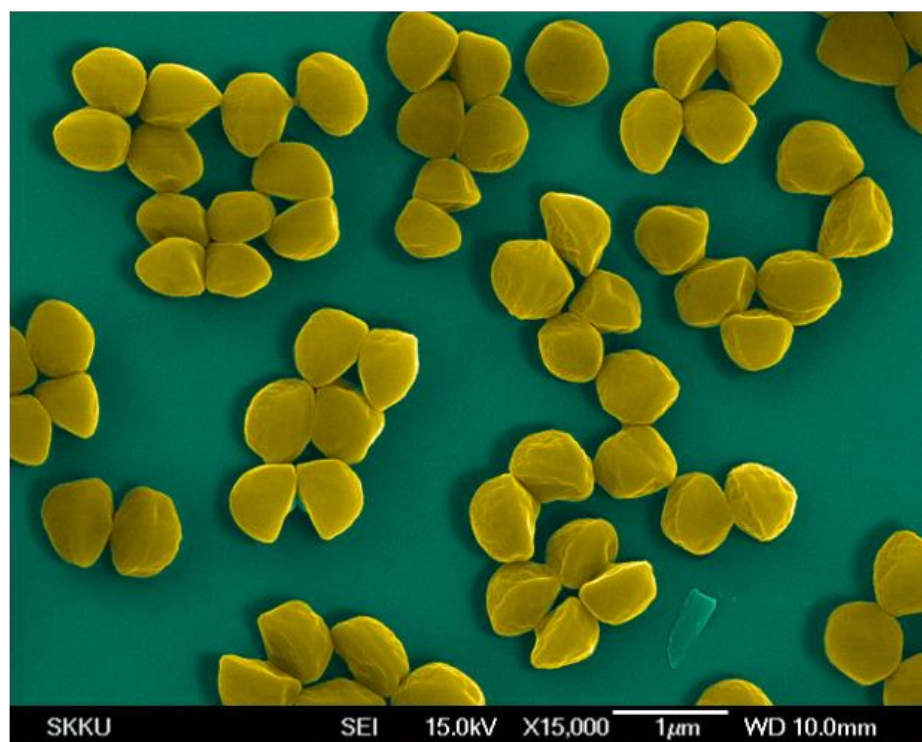

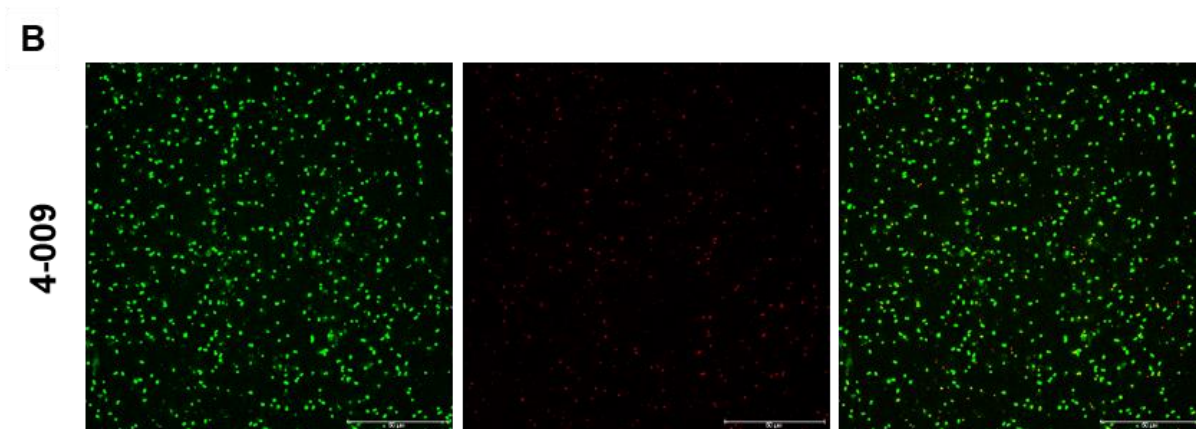

**Supporting Fig. S2. Scanning electron and confocal microscopy of ST72 resistant soil isolate, 4-009 to assess lysostaphin-mediated alteration in cell morphology and live/dead staining.** (A-A') SEM photomicrograph to assess the lysostaphin-mediated alteration in the cell morphology of lysostaphin resistant (*lys*<sup>r</sup>) ST72 soil isolate 4-009 before (A) and after lysostaphin treatment (A') and displayed no alterations post lysostaphin treatment (A'); (B) Live/dead images of *S. aureus* lysostaphin resistant (*lys*<sup>r</sup>) ST72 isolate, 4-009 after lysostaphin treatment (4 U) using SYTO9/PI for 5 min. The total number of 4-009 cells were stained with SYTO9 stain (SYTO channel; green fluorescent cells) while a smaller proportion of cells were stained with PI (PI channel; red fluorescent cells) showing dead cells.

### Supporting Fig. S3

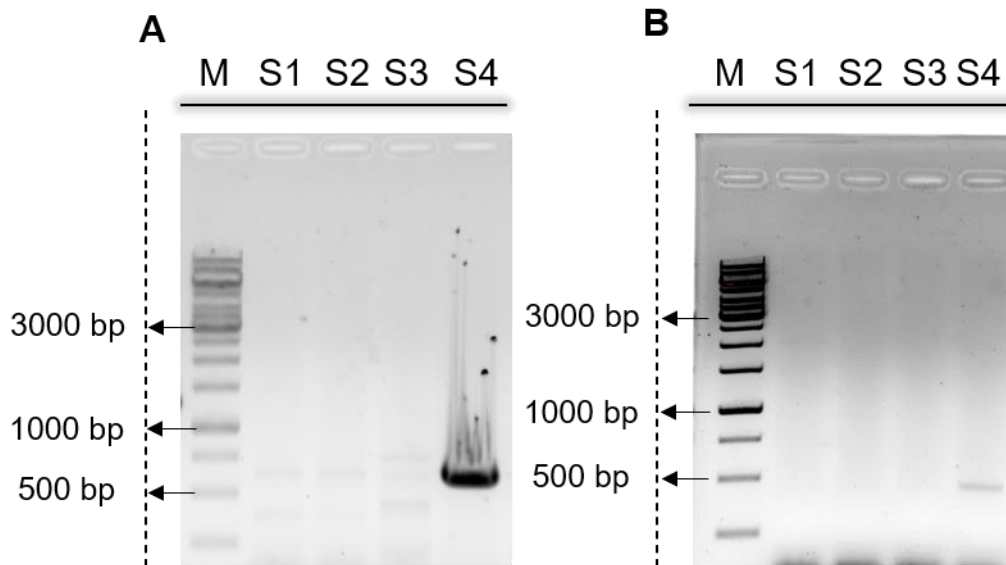

**Supporting Fig. S3. PCR based screening of presence/absence of *epr* and *lss* genes responsible for lysostaphin resistance in human isolates of ST72.** (A) Agarose gel showing the presence/absence of endopeptidase gene (*epr*) screened by PCR amplification in ST72 isolates, K07-204 (S1), K07-561 (S2) as compared to *S. aureus* USA300 (negative control, S3) and *S. simulans* (positive control, S4) wherein the *epr* gene was amplified only in *S. simulans* on agarose gel conferring lysostaphin protection. (B) Agarose gel showing the PCR amplified lysostaphin gene (*lss*) in ST72 isolates, K07-204 (S1), K07-561 (S2) as compared to *S. aureus* USA300 (negative control, S3) and *S. simulans* (positive control, S4) wherein the *lss* gene was amplified only in *S. simulans* conferring lysostaphin production. (M denotes the 1kb DNA marker ranging from 250 bp to 10 kb). These results indicate that the ST72 isolates, K07-204 (*lys*<sup>r</sup>) and K07-561 (*lys*<sup>r</sup>) are not the lysostaphin producers.

## Supporting Fig. S4

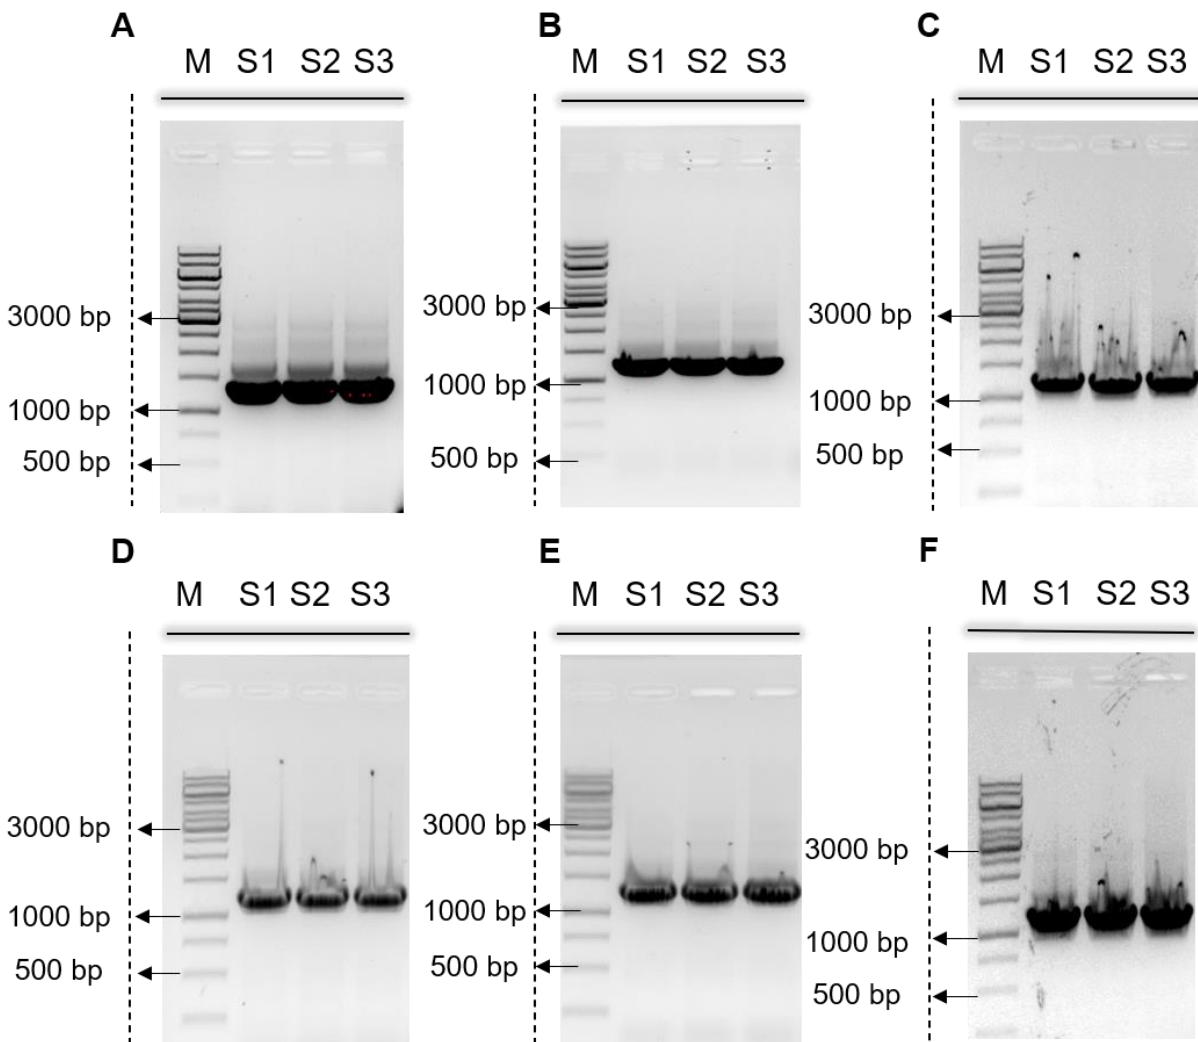

**Supporting Fig. S4. PCR amplification, cloning, sequencing, and screening of associated mutation(s) in other key genes known for lysostaphin resistance. (A-F)** Agarose gel showing the amplification of *femA* (A) *femB* (B) *femX* (C) *fmhC* (D) *lyrA* (E) and *shmT* (F) in ST72 isolates, K07-204 (S1), K07-561 (S2) and *S. aureus* USA300 (S3). These genes were amplified to clone in pCRTOP02.1 cloning vector. Clones were sequenced to assess the mutation(s), if any, known to be responsible for lysostaphin resistance. M denotes the 1kb DNA marker ranging from 250 bp to 10 kb.

## Supporting Fig. S5

**A**

|              |                                                                                                                                   |     |     |     |     |     |     |     |     |     |     |     |     |     |
|--------------|-----------------------------------------------------------------------------------------------------------------------------------|-----|-----|-----|-----|-----|-----|-----|-----|-----|-----|-----|-----|-----|
|              | 1                                                                                                                                 | 10  | 20  | 30  | 40  | 50  | 60  | 70  | 80  | 90  | 100 | 110 | 120 | 130 |
| K07-204_fenA | AKLINERQIGVMINKFTNLTAKEFGAFTDSHPYSHTQTQVGHYELKLAEGYETHLVGIXNNNEVIARCLLTAVPVHKKVFKYFYSNRGPVIDYENQELVHFFFNELSKYVKKARCLYLHIDPILPYQYL |     |     |     |     |     |     |     |     |     |     |     |     |     |
| K07-561_fenA | AKLINERQIGVMINKFTNLTAKEFGAFTDSHPYSHTQTQVGHYELKLAEGYETHLVGIXNNNEVIARCLLTAVPVHKKVFKYFYSNRGPVIDYENQELVHFFFNELSKYVKKARCLYLHIDPILPYQYL |     |     |     |     |     |     |     |     |     |     |     |     |     |
| Consensus    | AKLINERQIGVMINKFTNLTAKEFGAFTDSHPYSHTQTQVGHYELKLAEGYETHLVGIXNNNEVIARCLLTAVPVHKKVFKYFYSNRGPVIDYENQELVHFFFNELSKYVKKARCLYLHIDPILPYQYL |     |     |     |     |     |     |     |     |     |     |     |     |     |
|              | 131                                                                                                                               | 140 | 150 | 160 | 170 | 180 | 190 | 200 | 210 | 220 | 230 | 240 | 250 | 260 |
| K07-204_fenA | HDEITGNAGNDWFFDKMSNLGFEHTGFHKGFDPVLQIRYHSVLDLKDKTADDDIKHNDGLRKRNTKKVKNQVYKVFLEEELPIFRSFHEDTSEKRAFADRODKFYNNRLKYKDRVLYPLAYINFE     |     |     |     |     |     |     |     |     |     |     |     |     |     |
| K07-561_fenA | HDEITGNAGNDWFFDKMSNLGFEHTGFHKGFDPVLQIRYHSVLDLKDKTADDDIKHNDGLRKRNTKKVKNQVYKVFLEEELPIFRSFHEDTSEKRAFADRODKFYNNRLKYKDRVLYPLAYINFE     |     |     |     |     |     |     |     |     |     |     |     |     |     |
| Consensus    | HDEITGNAGNDWFFDKMSNLGFEHTGFHKGFDPVLQIRYHSVLDLKDKTADDDIKHNDGLRKRNTKKVKNQVYKVFLEEELPIFRSFHEDTSEKRAFADRODKFYNNRLKYKDRVLYPLAYINFE     |     |     |     |     |     |     |     |     |     |     |     |     |     |
|              | 261                                                                                                                               | 270 | 280 | 290 | 300 | 310 | 320 | 330 | 340 | 350 | 360 | 370 | 380 | 390 |
| K07-204_fenA | YIKELNEERDILNKDLNKALKDIEKRPENKKAHNRKDLQQQLDANEQKTEEGKALQEEHGNELPTSRGFFINPFEVYYYAGGTSNRFHAFAGSYAYQHEINIALNHGIDRYNFYGVSGKFTEDREA    |     |     |     |     |     |     |     |     |     |     |     |     |     |
| K07-561_fenA | YIKELNEERDILNKDLNKALKDIEKRPENKKAHNRKDLQQQLDANEQKTEEGKALQEEHGNELPTSRGFFINPFEVYYYAGGTSNRFHAFAGSYAYQHEINIALNHGIDRYNFYGVSGKFTEDREA    |     |     |     |     |     |     |     |     |     |     |     |     |     |
| Consensus    | YIKELNEERDILNKDLNKALKDIEKRPENKKAHNRKDLQQQLDANEQKTEEGKALQEEHGNELPTSRGFFINPFEVYYYAGGTSNRFHAFAGSYAYQHEINIALNHGIDRYNFYGVSGKFTEDREA    |     |     |     |     |     |     |     |     |     |     |     |     |     |
|              | 391                                                                                                                               | 400 | 410 | 420 | 430 | 433 |     |     |     |     |     |     |     |     |
| K07-204_fenA | GVYFKKGYNAEIIIEYVGDFIKPINKPYRAYTALKKYKORIF                                                                                        |     |     |     |     |     |     |     |     |     |     |     |     |     |
| K07-561_fenA | GVYFKKGYNAEIIIEYVGDFIKPINKPYRAYTALKKYKORIF                                                                                        |     |     |     |     |     |     |     |     |     |     |     |     |     |
| Consensus    | GVYFKKGYNAEIIIEYVGDFIKPINKPYRAYTALKKYKORIF                                                                                        |     |     |     |     |     |     |     |     |     |     |     |     |     |

**B**

|              |                                                                                                                                  |     |     |     |     |     |     |     |     |     |     |     |     |     |
|--------------|----------------------------------------------------------------------------------------------------------------------------------|-----|-----|-----|-----|-----|-----|-----|-----|-----|-----|-----|-----|-----|
|              | 1                                                                                                                                | 10  | 20  | 30  | 40  | 50  | 60  | 70  | 80  | 90  | 100 | 110 | 120 | 130 |
| K07-204_fenB | HKFTTELTYTEFDMFYQNPISLESHYFQVKEIYTRENDGFEVLLGIXDNNKVIARSLFSKIPTHGSSYYYSSNRGPVNDSDGLVDYVYKELDKYLQHQCLYKLDOPYLHYLYDKDIYPFEGREKND   |     |     |     |     |     |     |     |     |     |     |     |     |     |
| K07-561_fenB | HKFTTELTYTEFDMFYQNPISLESHYFQVKEIYTRENDGFEVLLGIXDNNKVIARSLFSKIPTHGSSYYYSSNRGPVNDSDGLVDYVYKELDKYLQHQCLYKLDOPYLHYLYDKDIYPFEGREKND   |     |     |     |     |     |     |     |     |     |     |     |     |     |
| Consensus    | HKFTTELTYTEFDMFYQNPISLESHYFQVKEIYTRENDGFEVLLGIXDNNKVIARSLFSKIPTHGSSYYYSSNRGPVNDSDGLVDYVYKELDKYLQHQCLYKLDOPYLHYLYDKDIYPFEGREKND   |     |     |     |     |     |     |     |     |     |     |     |     |     |
|              | 131                                                                                                                              | 140 | 150 | 160 | 170 | 180 | 190 | 200 | 210 | 220 | 230 | 240 | 250 | 260 |
| K07-204_fenB | ALVNLFSHGEYEHGFTTEYDTSQVYRHGVLNLEGGTPELTKKTFDSQRKNINKAINDYGVYKVFLEDEDFNLFLDLYRETEERAGFYSKTDYFYNYFIDTYGDKVLYPLAYIDLDEYVYKQLQELNOK |     |     |     |     |     |     |     |     |     |     |     |     |     |
| K07-561_fenB | ALVNLFSHGEYEHGFTTEYDTSQVYRHGVLNLEGGTPELTKKTFDSQRKNINKAINDYGVYKVFLEDEDFNLFLDLYRETEERAGFYSKTDYFYNYFIDTYGDKVLYPLAYIDLDEYVYKQLQELNOK |     |     |     |     |     |     |     |     |     |     |     |     |     |
| Consensus    | ALVNLFSHGEYEHGFTTEYDTSQVYRHGVLNLEGGTPELTKKTFDSQRKNINKAINDYGVYKVFLEDEDFNLFLDLYRETEERAGFYSKTDYFYNYFIDTYGDKVLYPLAYIDLDEYVYKQLQELNOK |     |     |     |     |     |     |     |     |     |     |     |     |     |
|              | 261                                                                                                                              | 270 | 280 | 290 | 300 | 310 | 320 | 330 | 340 | 350 | 360 | 370 | 380 | 390 |
| K07-204_fenB | ENRRQDMHAKENKSKQKQKIKRELKQIQDQHELLNASELSKTDGPTLNLASGVYFANAYEVNYFSGGSSEKYNQFNGPYNNHAFINNYCFDNGYDRYNYGLSGDFTENSEDYGYRFKRGFNQIEE    |     |     |     |     |     |     |     |     |     |     |     |     |     |
| K07-561_fenB | ENRRQDMHAKENKSKQKQKIKRELKQIQDQHELLNASELSKTDGPTLNLASGVYFANAYEVNYFSGGSSEKYNQFNGPYNNHAFINNYCFDNGYDRYNYGLSGDFTENSEDYGYRFKRGFNQIEE    |     |     |     |     |     |     |     |     |     |     |     |     |     |
| Consensus    | ENRRQDMHAKENKSKQKQKIKRELKQIQDQHELLNASELSKTDGPTLNLASGVYFANAYEVNYFSGGSSEKYNQFNGPYNNHAFINNYCFDNGYDRYNYGLSGDFTENSEDYGYRFKRGFNQIEE    |     |     |     |     |     |     |     |     |     |     |     |     |     |
|              | 391                                                                                                                              | 400 | 410 | 413 |     |     |     |     |     |     |     |     |     |     |
| K07-204_fenB | LIGDFYKPIHKYKYLFTTLKLRKKLKK                                                                                                      |     |     |     |     |     |     |     |     |     |     |     |     |     |
| K07-561_fenB | LIGDFYKPIHKYKYLFTTLKLRKKLKK                                                                                                      |     |     |     |     |     |     |     |     |     |     |     |     |     |
| Consensus    | LIGDFYKPIHKYKYLFTTLKLRKKLKK                                                                                                      |     |     |     |     |     |     |     |     |     |     |     |     |     |

**C**

|              |                                                                                                                                   |     |     |     |     |     |     |     |     |     |     |     |     |     |
|--------------|-----------------------------------------------------------------------------------------------------------------------------------|-----|-----|-----|-----|-----|-----|-----|-----|-----|-----|-----|-----|-----|
|              | 1                                                                                                                                 | 10  | 20  | 30  | 40  | 50  | 60  | 70  | 80  | 90  | 100 | 110 | 120 | 130 |
| K07-204_fenX | HEKMHITNQEHDFAVKSHPNGOLLQLTKARETKKLGHYARRIYVGRDGEVQVQALLFKKVPKLPYTLCTYSRGFVVDYSNKEALNALLDSARETAKREKRYARIKIDPOVEYDKGTDALQNLKALGFKH |     |     |     |     |     |     |     |     |     |     |     |     |     |
| K07-561_fenX | HEKMHITNQEHDFAVKSHPNGOLLQLTKARETKKLGHYARRIYVGRDGEVQVQALLFKKVPKLPYTLCTYSRGFVVDYSNKEALNALLDSARETAKREKRYARIKIDPOVEYDKGTDALQNLKALGFKH |     |     |     |     |     |     |     |     |     |     |     |     |     |
| Consensus    | HEKMHITNQEHDFAVKSHPNGOLLQLTKARETKKLGHYARRIYVGRDGEVQVQALLFKKVPKLPYTLCTYSRGFVVDYSNKEALNALLDSARETAKREKRYARIKIDPOVEYDKGTDALQNLKALGFKH |     |     |     |     |     |     |     |     |     |     |     |     |     |
|              | 131                                                                                                                               | 140 | 150 | 160 | 170 | 180 | 190 | 200 | 210 | 220 | 230 | 240 | 250 | 260 |
| K07-204_fenX | KGKKEGLSKDYIQPRNTHITPIDKNDDELLNSFERNRASKVRLALKRGTTVERSOREGLKTFRELAKITGERDGLTRDISYFENIYDALHEDGARELFLVKLPKENIYAKVNOELNELHAEITKQKQKH |     |     |     |     |     |     |     |     |     |     |     |     |     |
| K07-561_fenX | KGKKEGLSKDYIQPRNTHITPIDKNDDELLNSFERNRASKVRLALKRGTTVERSOREGLKTFRELAKITGERDGLTRDISYFENIYDALHEDGARELFLVKLPKENIYAKVNOELNELHAEITKQKQKH |     |     |     |     |     |     |     |     |     |     |     |     |     |
| Consensus    | KGKKEGLSKDYIQPRNTHITPIDKNDDELLNSFERNRASKVRLALKRGTTVERSOREGLKTFRELAKITGERDGLTRDISYFENIYDALHEDGARELFLVKLPKENIYAKVNOELNELHAEITKQKQKH |     |     |     |     |     |     |     |     |     |     |     |     |     |
|              | 261                                                                                                                               | 270 | 280 | 290 | 300 | 310 | 320 | 330 | 340 | 350 | 360 | 370 | 380 | 390 |
| K07-204_fenX | ETSEKQAKKQNMNDQAKIKAKNEOLKRDLEALEKEHPEGIYLGALLHAFAGSKSYLYGASSNEFRDPLPNHHNQYTHMKYAREHGATTYDFGGTNDPDKDSEHYGLWAFKKYVGTLYSEKIGEDY     |     |     |     |     |     |     |     |     |     |     |     |     |     |
| K07-561_fenX | ETSEKQAKKQNMNDQAKIKAKNEOLKRDLEALEKEHPEGIYLGALLHAFAGSKSYLYGASSNEFRDPLPNHHNQYTHMKYAREHGATTYDFGGTNDPDKDSEHYGLWAFKKYVGTLYSEKIGEDY     |     |     |     |     |     |     |     |     |     |     |     |     |     |
| Consensus    | ETSEKQAKKQNMNDQAKIKAKNEOLKRDLEALEKEHPEGIYLGALLHAFAGSKSYLYGASSNEFRDPLPNHHNQYTHMKYAREHGATTYDFGGTNDPDKDSEHYGLWAFKKYVGTLYSEKIGEDY     |     |     |     |     |     |     |     |     |     |     |     |     |     |
|              | 391                                                                                                                               | 400 | 410 | 421 |     |     |     |     |     |     |     |     |     |     |
| K07-204_fenX | VLNQPLYLQIEQVKPRLTKAKIKISRLKRRK                                                                                                   |     |     |     |     |     |     |     |     |     |     |     |     |     |
| K07-561_fenX | VLNQPLYLQIEQVKPRLTKAKIKISRLKRRK                                                                                                   |     |     |     |     |     |     |     |     |     |     |     |     |     |
| Consensus    | VLNQPLYLQIEQVKPRLTKAKIKISRLKRRK                                                                                                   |     |     |     |     |     |     |     |     |     |     |     |     |     |

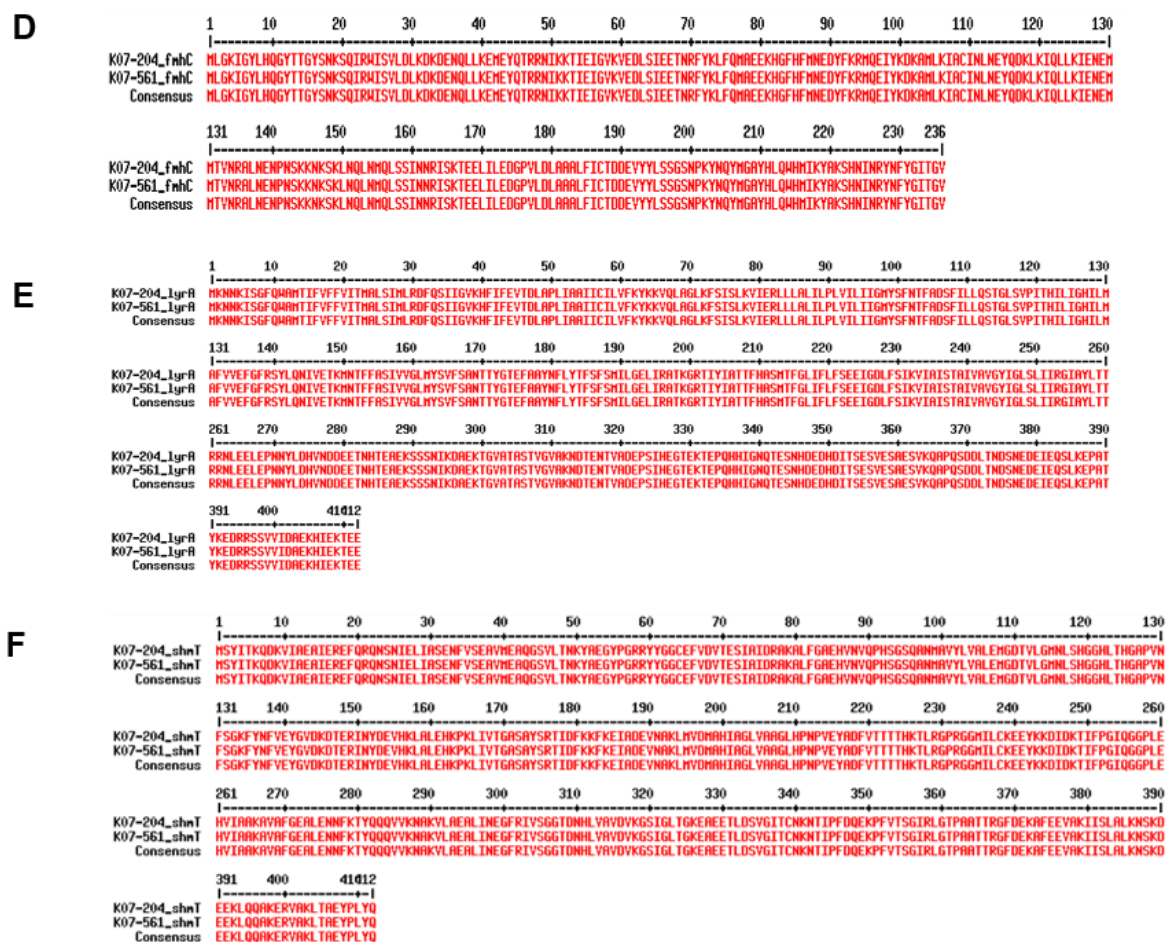

**Supplementary Fig. S5. Cloning, sequencing, multiple sequence alignment to assess the mutation(s) upon translated DNA sequences. (A-F) Cloning of (A) *femA*, (B) *femB*, (C) *femX*, (D) *fmhC*, (E) *lyrA* (F) and *shmT* into pCR2.1TOPO cloning vector followed by DNA sequencing of multiple clones to assess mutation, if any, responsible for differential lysostaphin resistance between human isolates of ST72 K07-204 (*lys<sup>r</sup>*) and K07-561 (*lys<sup>s</sup>*). The sequenced DNA were translated *in-silico* to get amino acid sequences. The amino acid sequences of lysostaphin resistant (*lys<sup>r</sup>*) K07-204 and lysostaphin susceptible (*lys<sup>s</sup>*) K07-561 showed 100% identity. These results indicated that no known mechanism exists to explain the differential lysostaphin resistance between the lysostaphin resistant (*lys<sup>r</sup>*) K07-204 and lysostaphin susceptible (*lys<sup>s</sup>*) K07-561, human isolates of ST72.**

### Supporting Fig. S6

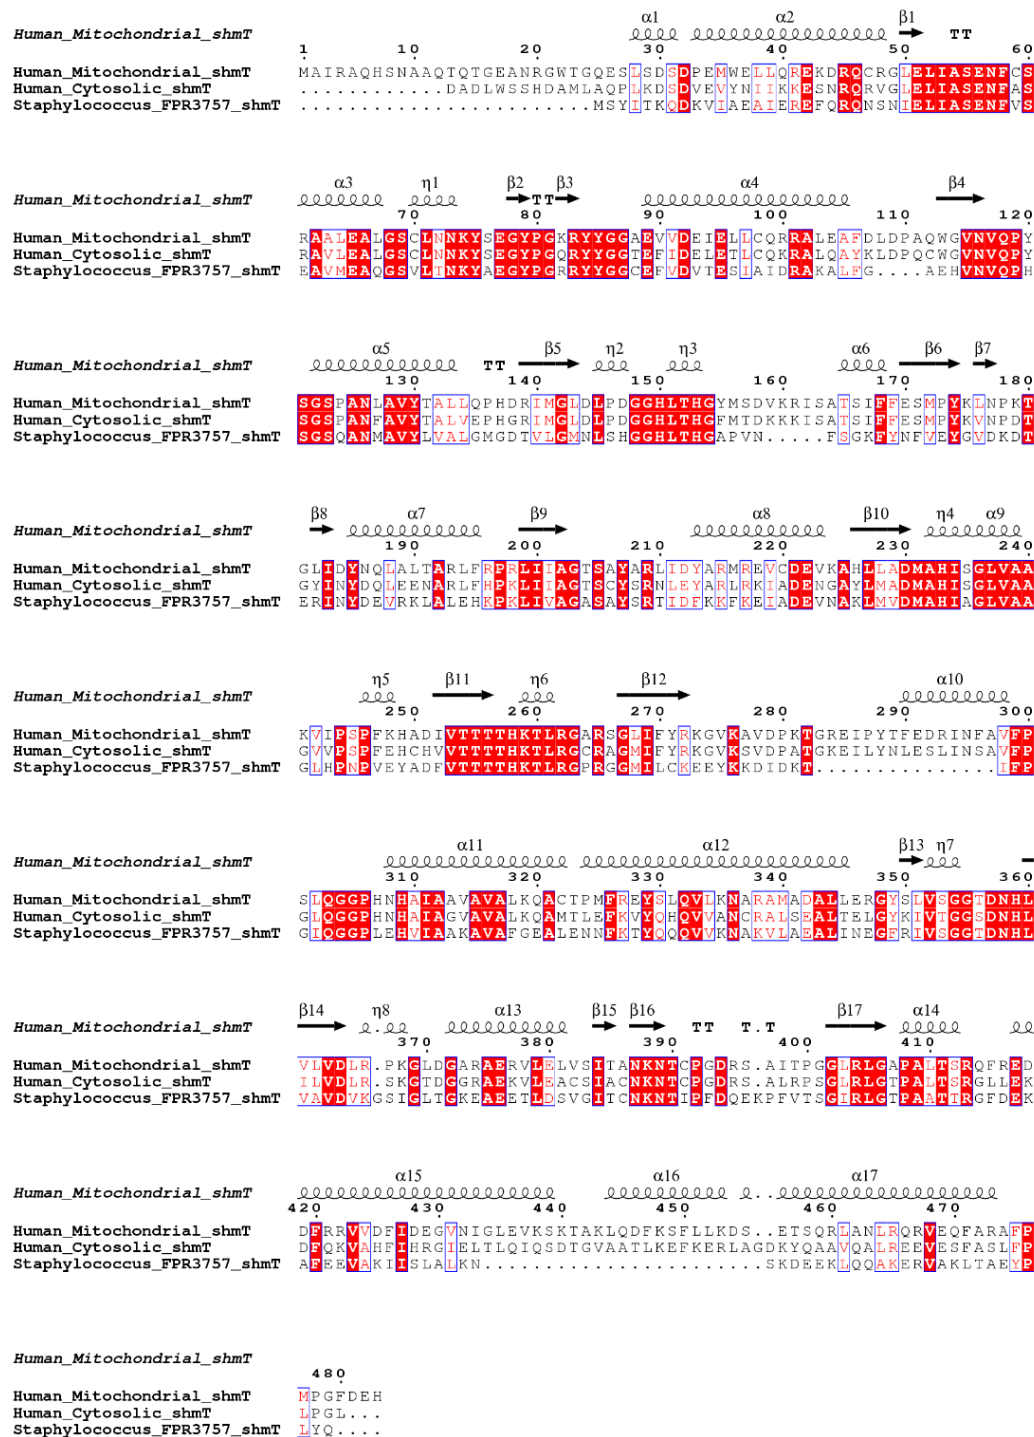

**Supporting Fig. S6. Alignment of SHMT from *S. aureus* USA300 with human SHMTs to assess the overall similarity and identity.** Alignment results showed a significantly high identity with two humans SHMTs, human cytosolic (UniProtKB - P34896) and mitochondrial SHMT (UniProtKB - P34897) with SHMT of *S. aureus* USA300 FPR3757 ([CP000255.1](#)). The human cytosolic and mitochondrial SHMT displayed 63.45% identity, while the human cytosolic and mitochondrial SHMT displayed 45.5% and 42% identity with SHMT of *S. aureus* USA300 FPR3757, respectively

## Supporting Fig. S7

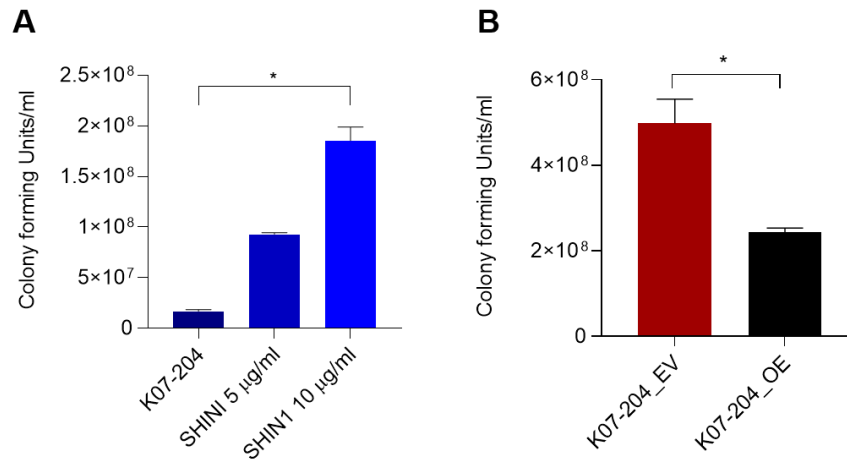

**Supporting Fig S7. Role of SHMT in lysostaphin resistance of K07-204 human isolate of ST72.** (A) The phenotypic assessment of lysostaphin resistance/susceptibility of K07-204 upon SHIN1-mediated inhibition of SHMT wherein the inhibition of SHMT marginally enhanced the resistance of K07-204, while (B) the overexpression of *shmT* (K07-204 with pRMC2\_ *shmT*) showed reduced lysostaphin resistance of K07-204. The lysostaphin killing assay was performed by using 5 units for 10 min incubation.

## Supporting Fig. S8

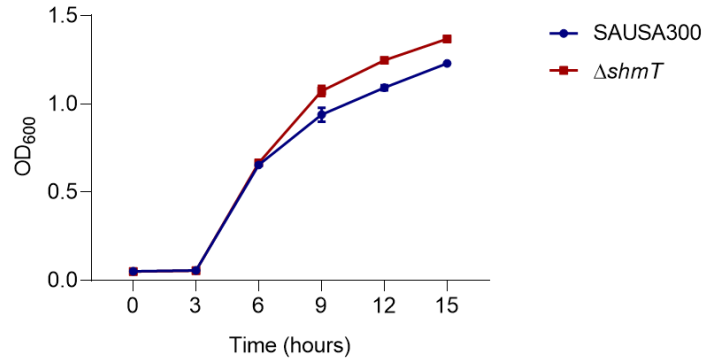

**Supporting Fig. S8. The role of *shmT* on the fitness of *S. aureus* USA300.** The role of *shmT* on the fitness of SAUSA300 was assessed by comparing the growth of wild type SAUSA300 and  $\Delta shmT$  knockout in TSB media for 16h. The growth of the  $\Delta shmT$  knockout and wild type SAUSA300 was found to be comparable.

## Supporting Fig. S9

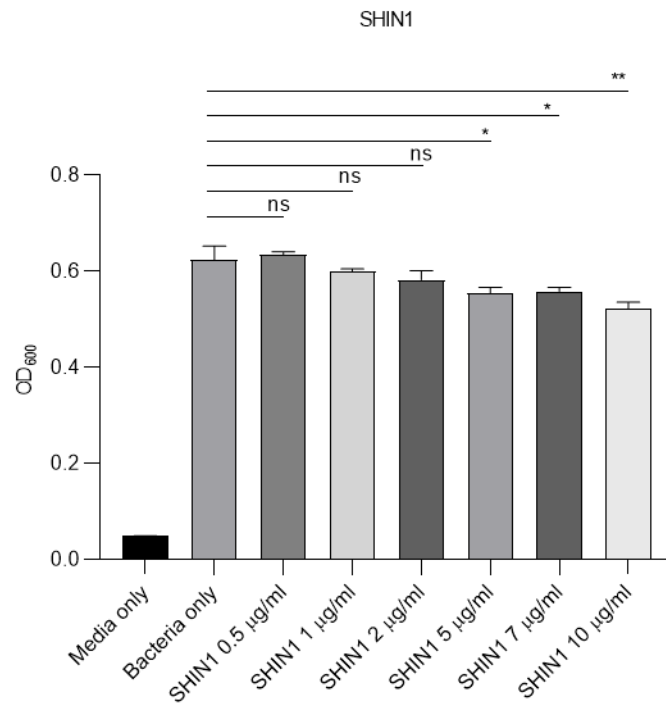

**Supporting Fig. S9. Serine hydroxymethyltransferase inhibitor 1 (SHIN1) toxicity to *S. aureus* USA300 cells at varying concentrations.** The SHIN1 showed insignificant inhibition of bacterial growth up to 2 µg/mL while a mild inhibition in the cell division was observed beyond 2 to 10 µg/mL, measured by estimating the inhibition of cell density at OD<sub>600 nm</sub>.

**Table S1.** *S. aureus* ST72 isolates

| Sequence type 72 | MRSA/MSSA | Source of Isolation | Reference           |
|------------------|-----------|---------------------|---------------------|
| K01-140          | MRSA      | Human               | <a href="#">[1]</a> |
| K07-204          | MRSA      | Human               |                     |
| K07-322          | MRSA      | Human               |                     |
| K01-799          | MSSA      | Human               |                     |
| K07-006          | MSSA      | Human               |                     |
| K07-561          | MSSA      | Human               |                     |
| 05-B-52          | MRSA      | Animal              |                     |
| 05-B-60          | MRSA      | Animal              |                     |
| 08-B-93          | MRSA      | Animal              |                     |
| 08-P-236         | MRSA      | Animal              |                     |
| 4-009            | MRSA      | Soil                |                     |

**Table S2. Primers used in the study**

| Purpose | Name                  | Sequence (5'-3')                             | Reference/Source | Amplicon size (bp) |
|---------|-----------------------|----------------------------------------------|------------------|--------------------|
| PCR     | <i>lss_fwd</i>        | GCTATTGGACTGAGTACATTTGCC                     | This study       | Not amplified      |
|         | <i>lss_rev</i>        | CTGCGGCATGCTTCTAAATGGACCAGTC                 |                  |                    |
|         | <i>epr_fwd</i>        | CTAYWCACATMGMGGTCCWGTCAATTRAC                | This study       | Not amplified      |
|         | <i>epr_rev</i>        | TTAGAATTAGGGTTTTCTTTTAAT                     |                  |                    |
|         | <i>fmhC_fwd_KpnI</i>  | AACATAGGTACCATGAAATTTTCAACTTTAAGTG           | This study       | 1245               |
|         | <i>fmhC_rev_EcoRI</i> | AAGATAGAATTCTCAAACCTTATAAATAAGTTTTGC         |                  |                    |
|         | <i>femA_fwd_KpnI</i>  | AACATAGGTACCTTGCAGAGGGGAAATAGAAAACTG         | This study       | 1338               |
|         | <i>femA_rev_EcoRI</i> | C<br>AAGATAGAATTCTCTAAAAAATTCTGTCTTTAACTTTTT |                  |                    |
|         | <i>femB_fwd_KpnI</i>  | AACATAGGTACCATGAAATTTACAGAGTTAACTG           | This study       | 1260               |
|         | <i>femB_rev_EcoRI</i> | AAGATAGAATTCTCTATTTCTTTAATTTTTTACGT          |                  |                    |
|         | <i>femX_fwd_KpnI</i>  | AACATAGGTACCATGGAAAAGATGCATATCACTAATC        | This study       | 1266               |
|         | <i>femX_rev_EcoRI</i> | AAGATAGAATTCTCTATTTTCGTTTTAATTTACGAG         |                  |                    |
|         | <i>lyrA_fwd_KpnI</i>  | AACATAGGTACCATGAAGAACAATAAAATTTCTG           | This study       | 1260               |
|         | <i>lyrA_rev_EcoRI</i> | AAGATAGAATTCTTATTTGTTTTATCTGAAGATTG          |                  |                    |
|         | <i>shmT_fwd_KpnI</i>  | AACATAGGTACCATGTCTTATATCACCAAGCAAG           | This study       | 1239               |
|         | <i>shmT_rev_EcoRI</i> | AAGATAGAATTCTTATTGATATAGAGGATATTCAGC         |                  |                    |
| qRT-PCR | <i>gyrA_fwd</i>       | CGTCAACGTATTGTTGTCAC                         | This study       | 180                |
|         | <i>gyrA_rev</i>       | ACACTAGCATTTGCATCCTT                         |                  |                    |
|         | <i>shmT_fwd</i>       | TCGGAAGCGGTTATGGAA                           | This study       | 196                |
|         | <i>shmT_rev</i>       | CAGCCATGTTGCTTGTTG                           |                  |                    |

**Table S3. Staphylococcal strains/isolates and plasmid used in the study**

| Strains | Organisms                                            | Descriptions                                                                                                   | Reference/Source |
|---------|------------------------------------------------------|----------------------------------------------------------------------------------------------------------------|------------------|
| Strains | <i>Escherichia coli</i> DH5α                         | <i>F- endA1 glnV44 thi-1 recA1 relA1 gyrA96 deoRnupG Φ80dlacZΔM15 Δ(lacZYA-argF) U169, hsdR17(rK- mK+), λ-</i> | Invitrogen, USA  |
|         | <i>E. coli</i> DH5α_pRMC2                            | For amplification of pRMC2 vector, amp <sup>r</sup>                                                            | This study       |
|         | WT USA300 FPR3757                                    | JE2, wild-type epidemic community-associated methicillin-resistant <i>S. aureus</i> isolate USA300 LAC         | NARSA            |
|         | RN4220                                               | Restriction-deficient strain of NCTC8325                                                                       | [2]              |
|         | WT <i>Staphylococcus simulans</i>                    | Lysostaphin synthesizing ( <i>lss</i> ) and resistance gene ( <i>epr</i> )                                     | Lab collection   |
|         | WT <i>Staphylococcus saprophyticus</i>               | Lysostaphin resistant strain                                                                                   | KCTC3345         |
|         | RN4220_pRMC2                                         | For amplification of pRMC2 vector in <i>S. aureus</i> RN4220 as cloning intermediate, Cm <sup>r</sup>          | This study       |
|         | RN4220_pRMC2_ <i>shmT</i>                            | For amplification of pRMC2_ <i>shmT</i> in <i>S. aureus</i> RN4220 as cloning intermediate, Cm <sup>r</sup>    |                  |
|         | Δ <i>shmT</i>                                        | Knock out of <i>shmT</i> gene, Em <sup>r</sup>                                                                 | Nebraska library |
|         | SAUSA300_pRMC2                                       | SAUSA300_EV, Cm <sup>r</sup>                                                                                   | This study       |
|         | Δ <i>shmT</i> _pRMC2                                 | Δ <i>shmT</i> _EV, Cm <sup>r</sup>                                                                             | This study       |
|         | Δ <i>shmT</i> _pRMC2_ <i>shmT</i>                    | Δ <i>shmT</i> _Comp, Cm <sup>r</sup>                                                                           | This study       |
|         | SAUSA300_pRMC2_ <i>shmT</i>                          | SAUSA300_OE, Cm <sup>r</sup>                                                                                   | This study       |
|         | <i>E. coli</i> DH5α_pCR2.1 TOPO_ <i>K07-561_fmhC</i> | P <sub>lac</sub> , <i>K07-561_fmhC</i> , Km <sup>r</sup> , Amp <sup>r</sup>                                    | This study       |
|         | <i>E. coli</i> DH5α_pCR2.1 TOPO_ <i>K07-561_femA</i> | P <sub>lac</sub> , <i>K07-561_femA</i> , Km <sup>r</sup> , Amp <sup>r</sup>                                    | This study       |
|         | <i>E. coli</i> DH5α_pCR2.1 TOPO_ <i>K07-561_femB</i> | P <sub>lac</sub> , <i>K07-561_femB</i> , Km <sup>r</sup> , Amp <sup>r</sup>                                    | This study       |
|         | <i>E. coli</i> DH5α_pCR2.1 TOPO_ <i>K07-561_femX</i> | P <sub>lac</sub> , <i>K07-561_femX</i> , Km <sup>r</sup> , Amp <sup>r</sup>                                    | This study       |
|         | <i>E. coli</i> DH5α_pCR2.1 TOPO_ <i>K07-561_lyrA</i> | P <sub>lac</sub> , <i>K07-561_lyrA</i> , Km <sup>r</sup> , Amp <sup>r</sup>                                    | This study       |
|         | pCR2.1 TOPO_ <i>K07-561_shmT</i>                     | P <sub>lac</sub> , <i>K07-561_shmT</i> , Km <sup>r</sup> , Amp <sup>r</sup>                                    | This study       |

|                    |                                              |                                                                                                                         |                   |
|--------------------|----------------------------------------------|-------------------------------------------------------------------------------------------------------------------------|-------------------|
| Native<br>Plasmids | <i>E. coli</i> DH5α_pCR2.1 TOPO_K07-204_fmhC | P <sub>lac</sub> , K07-204_fmhC, Km <sup>r</sup> , Amp <sup>r</sup>                                                     | [3]<br>Invitrogen |
|                    | <i>E. coli</i> DH5α_pCR2.1 TOPO_K07-204_femA | P <sub>lac</sub> , K07-204_femA, Km <sup>r</sup> , Amp <sup>r</sup>                                                     |                   |
|                    | <i>E. coli</i> DH5α_pCR2.1 TOPO_K07-204_femB | P <sub>lac</sub> , K07-204_femB, Km <sup>r</sup> , Amp <sup>r</sup>                                                     |                   |
|                    | <i>E. coli</i> DH5α_pCR2.1 TOPO_K07-204_femX | P <sub>lac</sub> , K07-204_femX, Km <sup>r</sup> , Amp <sup>r</sup>                                                     |                   |
|                    | <i>E. coli</i> DH5α_pCR2.1 TOPO_K07-204_lyrA | P <sub>lac</sub> , K07-204_lyrA, Km <sup>r</sup> , Amp <sup>r</sup>                                                     |                   |
|                    | pCR2.1 TOPO_K07-204_shmT                     | P <sub>lac</sub> , K07-204_shmT, Km <sup>r</sup> , Amp <sup>r</sup>                                                     |                   |
| Native<br>Plasmids | pRMC2                                        | Expression vector under control of tetracycline<br>inducible P <sub>xyl/tetO</sub> , Amp <sup>r</sup> , Cm <sup>r</sup> |                   |
|                    | pCR2.1 TOPO                                  | Expression vector under control of lactose<br>inducible promoter P <sub>lac</sub> , Km <sup>r</sup> , Amp <sup>r</sup>  |                   |

---

## References

1. Ko, K. S.; Lim, S. K.; Jung, S. C.; Yoon, J. M.; Choi, J. Y.; Song, J. H., Sequence type 72 meticillin-resistant *Staphylococcus aureus* isolates from humans, raw meat and soil in South Korea. *J Med Microbiol* **2011**, 60, (Pt 4), 442-5.
2. Peng, H. L.; Novick, R. P.; Kreiswirth, B.; Kornblum, J.; Schlievert, P., Cloning, characterization, and sequencing of an accessory gene regulator (*agr*) in *Staphylococcus aureus*. *J Bacteriol* **1988**, 170, (9), 4365-72.
3. Corrigan, R. M.; Foster, T. J., An improved tetracycline-inducible expression vector for *Staphylococcus aureus*. *Plasmid* **2009**, 61, (2), 126-9.
